# Supplementary material for: A rigid calcium 2-ethylhexylphosphate one-dimensional polymer: synthesis, structure, thermal behaviour and decomposition chemistry
Source: Royal Society of Chemistry journal article supplement (doi:10.1039/d2dt03529d), 2023-01-01
Supplement: d2dt03529d1.pdf [file d2dt03529d1.pdf]

## Supporting information for

### A rigid calcium 2-ethylhexylphosphate one-dimensional polymer: Synthesis, structure, thermal behaviour and decomposition chemistry

Navneet Matharoo, Mrinalini G. Walawalkar and Ramaswamy Murugavel\*

**Fig. S1** IR (left) and PXRD (right) for the compound synthesised from the reaction of  $\text{Ca}(\text{OAc})_2$  and 1,10-phenanthroline.

**Fig. S2.** (a)  $^{31}\text{P}$  NMR spectrum of ligand (L1) of **1** in  $\text{CDCl}_3$ . (b)  $^{31}\text{P}$  NMR spectrum of mother liquor of **1** in  $\text{CDCl}_3$ .

**Fig. S3** CP-MAS  $^{13}\text{C}$  NMR spectrum of **1** (125 MHz).

**Fig. S4** CP-MAS  $^{13}\text{C}$  NMR spectrum of **2** (150 MHz).

**Fig. S5** Experimental and simulated PXRD patterns for **1** (left) at  $-123\text{ }^\circ\text{C}$  and **2** (right) at RT.

**Fig. S6** Experimental and simulated PXRD patterns for **1** at different temperatures.

**Fig. S8** ESI Mass spectrum of **2** in MeOH showing  $[(\text{phen})_2\text{Ca}_2(\text{OAc})_3]^+$  peak at 617.11.

**Fig. S9** DSC plot for **2** in the temperature range  $-150\text{ }^\circ\text{C}$  to  $150\text{ }^\circ\text{C}$ .

**Fig. S10** Variable temperature PXRD of **1** at temperature ranging from  $25\text{ }^\circ\text{C}$  to  $200\text{ }^\circ\text{C}$ .

**Fig. S11** SC-XRD derived molecular structure of **1** along a-axis at different temperatures.

**Fig. S12** SC-XRD derived molecular structure of **1** along b-axis at different temperatures.

**Fig. S13** SC-XRD derived molecular structure of **1** along c-axis at different temperatures.

**Fig. S14** (a) ORTEP diagram for **1** at  $-123\text{ }^\circ\text{C}$  (100 K), (b) ORTEP diagram for **1** at  $-70\text{ }^\circ\text{C}$  (203 K) and (c) ORTEP diagram for **1** at  $-40\text{ }^\circ\text{C}$  (233 K) and **2**.

**Fig. S15** Calculated PXRD of **1** from the single crystal diffraction data at  $-70\text{ }^\circ\text{C}$ ,  $-40\text{ }^\circ\text{C}$ ,  $-20\text{ }^\circ\text{C}$ ,  $0\text{ }^\circ\text{C}$ ,  $25\text{ }^\circ\text{C}$ ,  $50\text{ }^\circ\text{C}$  and  $100\text{ }^\circ\text{C}$ .

**Fig. S16** FT-IR of the decomposition product of **1** heated at  $500\text{ }^\circ\text{C}$ , corresponding to an amorphous calcium phosphate impregnated in carbon.

**Fig. S17** Raman spectrum of **1** thermolysed at  $500\text{ }^\circ\text{C}$  showing bands for residual carbonaceous phase.

**Fig. S18** SEM image of material obtained after thermal decomposition of **1** at  $500\text{ }^\circ\text{C}$  corresponding to an amorphous calcium phosphate impregnated in carbon.

**Fig. S19** EDS mapping of material obtained after thermal decomposition of **1** at  $500\text{ }^\circ\text{C}$  corresponding to an amorphous calcium phosphate impregnated in carbon.

**Fig. S20**  $^{31}\text{P}$  NMR of decomposition product of **1** at  $600\text{ }^\circ\text{C}$  corresponding to  $\alpha\text{-Ca}(\text{PO}_3)_2$ . Inset: for comparison the  $^{31}\text{P}$  MAS NMR spectrum of decomposition product  $[\text{Ca}(\text{dtbp})_2]_n$  at  $600\text{ }^\circ\text{C}$  producing same material. (S. Verma and R. Murugavel, *Inorg. Chem.*, 2020, **59**, 13233–13244.)

**Fig. S21** FT-IR spectrum of decomposition product of **1** calcined product  $\alpha\text{-Ca}(\text{PO}_3)_2$  produced at  $600\text{ }^\circ\text{C}$ . (Weil, M. et al. *Chem. Mater.* **2007**, *19*, 5067-5073.)

**Fig. S22** SEM images of  $\alpha\text{-Ca}(\text{PO}_3)_2$  material obtained after thermal decomposition of **1** at  $600\text{ }^\circ\text{C}$ .

**Fig. S23** EDS mapping of  $\alpha\text{-Ca}(\text{PO}_3)_2$  material obtained after thermal decomposition of **1** at  $600\text{ }^\circ\text{C}$ .

**Table S1.** Continuous Shape measures of the coordination polyhedra of six coordinated Ca(II) in **1**.

**Table S2.** Selected bond lengths [ $\text{\AA}$ ] and angles [ $^\circ$ ] for **1**.

**Table S3.** Continuous Shape measures of the coordination polyhedra of eight coordinated Ca(II) in **2**.

**Table S4.** Bond lengths [ $\text{\AA}$ ] and angles [ $^\circ$ ] for **2**.

**Table S5.** Heat flow vs temperature data for compound **1** in the temperature range from  $-150\text{ }^\circ\text{C}$  to  $200\text{ }^\circ\text{C}$ .

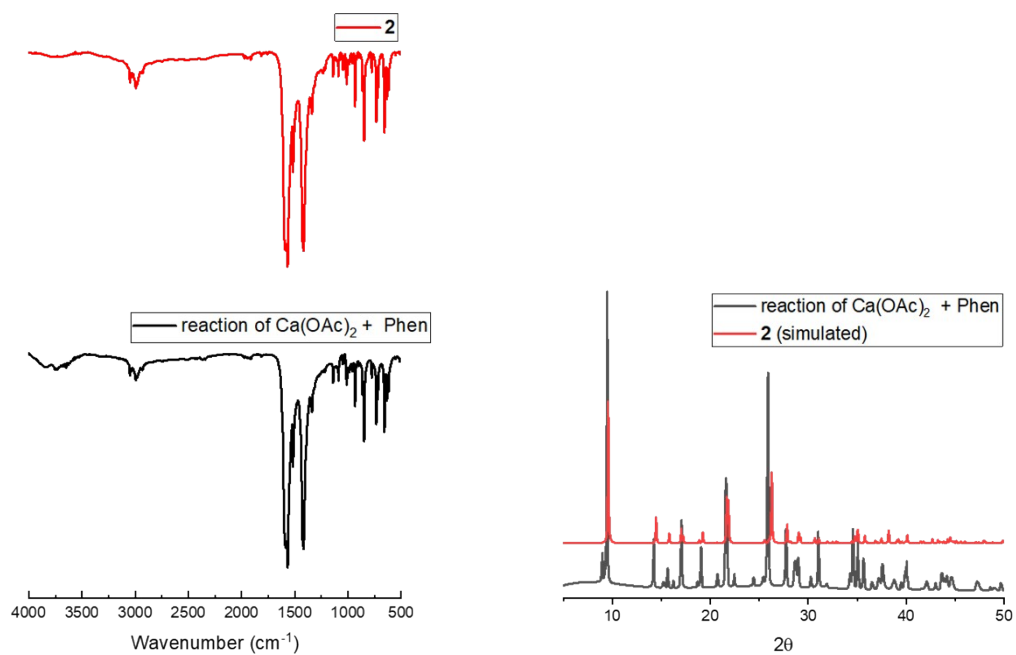

**Fig. S1** IR (left) and PXRD (right) for the compound synthesised from the reaction of  $\text{Ca}(\text{OAc})_2$  and 1,10-phenanthroline.

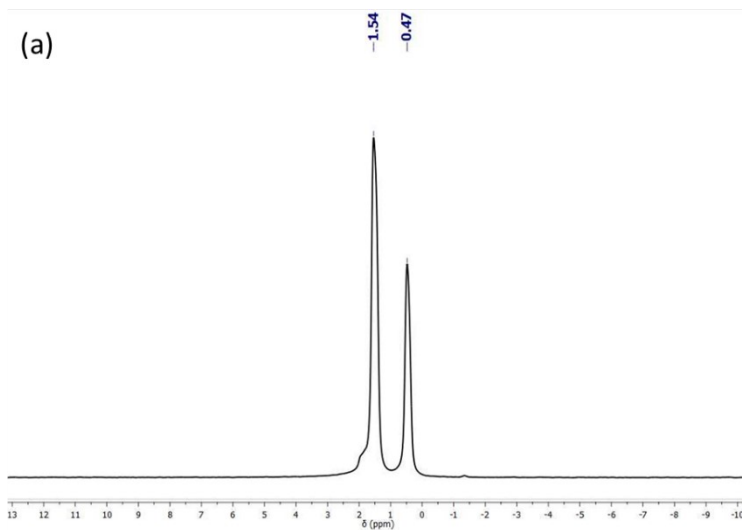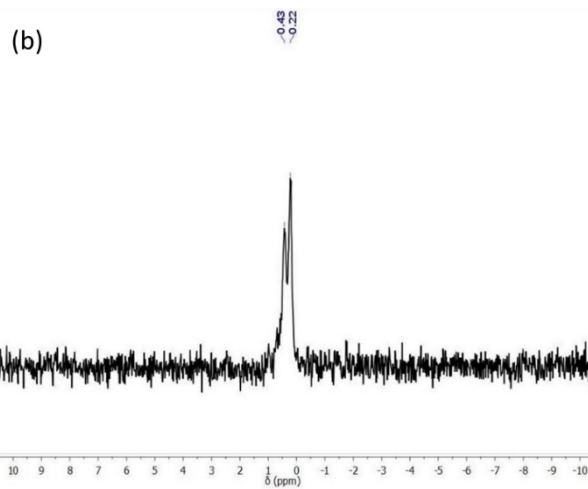

**Fig S2.** (a)  $^{31}\text{P}$  NMR spectrum of ligand (L1) of **1** in  $\text{CDCl}_3$ . (b)  $^{31}\text{P}$  NMR spectrum of mother liquor of **1** in  $\text{CDCl}_3$ .

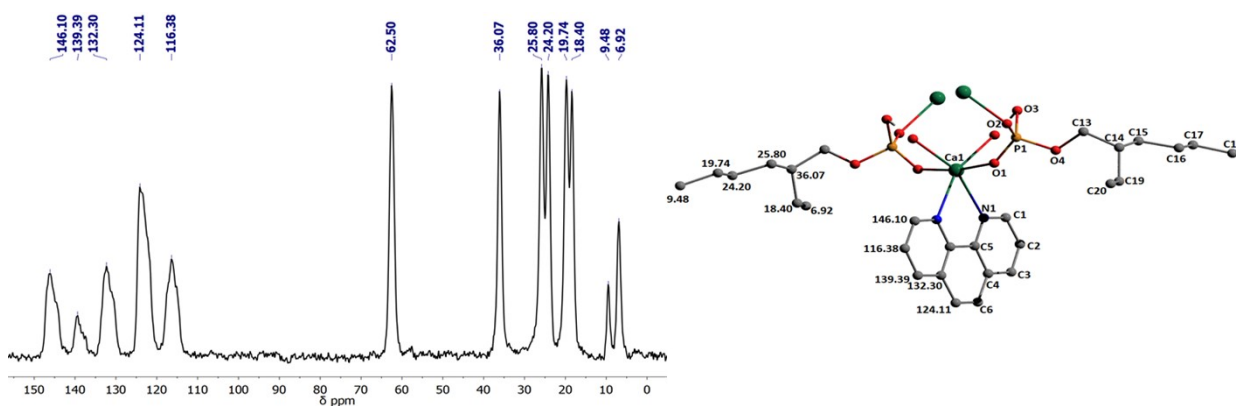

**Fig. S3** CP-MAS  $^{13}\text{C}$  NMR spectrum of **1** (125 MHz).

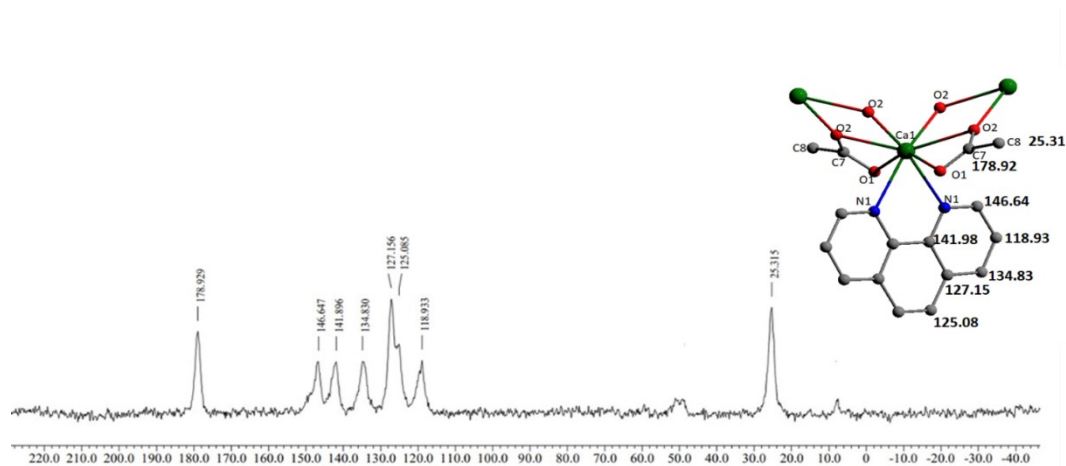

**Fig. S4** CP-MAS  $^{13}\text{C}$  NMR spectrum of **2** (150 MHz).

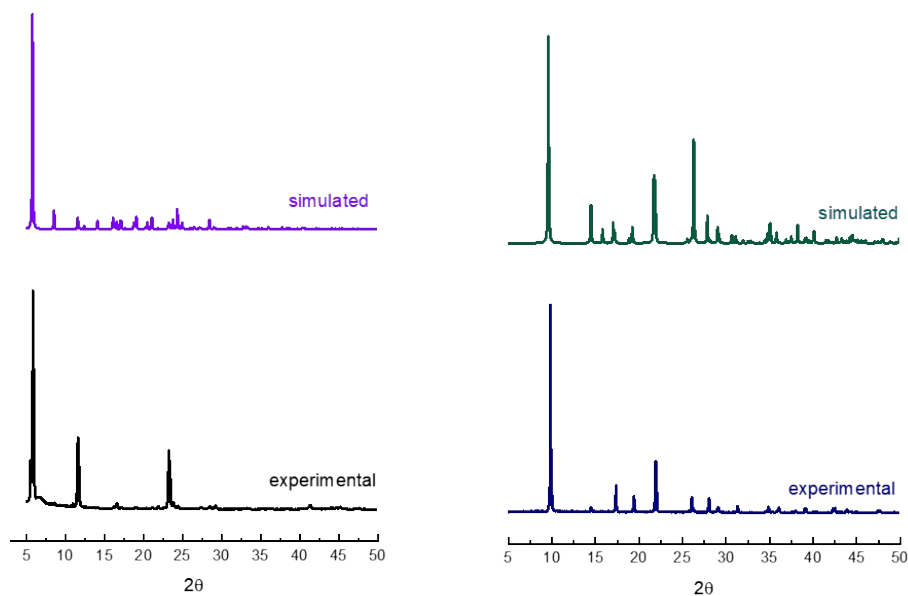

**Fig. S5** Experimental and simulated PXR patterns for **1** (left) at  $-123\text{ }^\circ\text{C}$  and **2** (right) at RT.

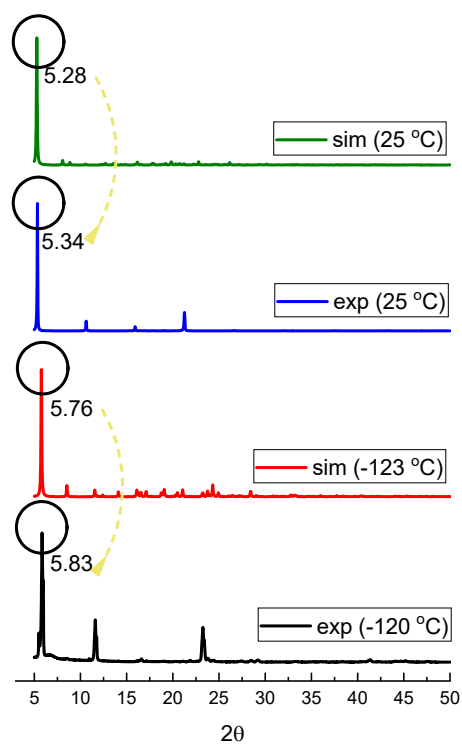

**Fig. S6** Experimental and simulated PXRD patterns for **1** at different temperatures.

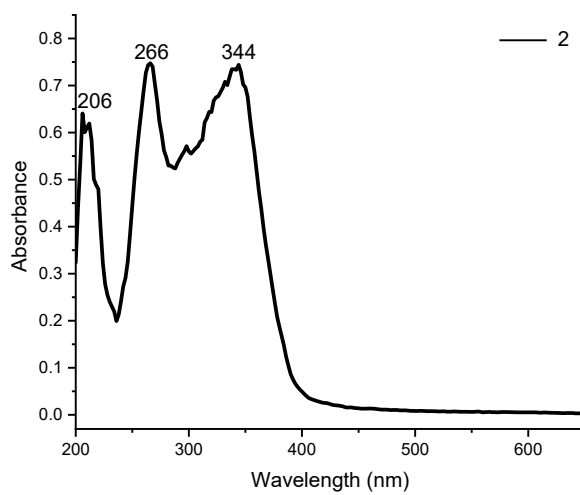

**Fig. S7** DR UV-Vis spectrum of **2**.

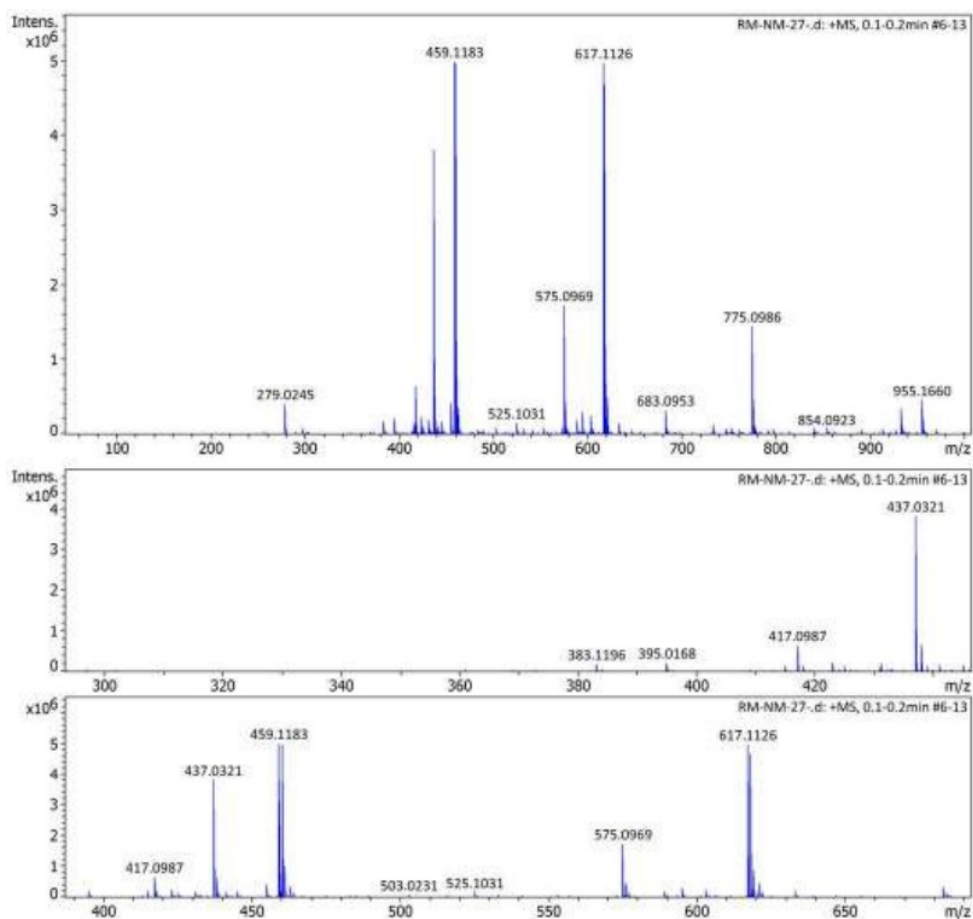

**Fig. S8** ESI Mass spectrum of **2** in MeOH showing  $[(\text{phen})_2\text{Ca}_2(\text{OAc})_3]^+$  peak at 617.11.

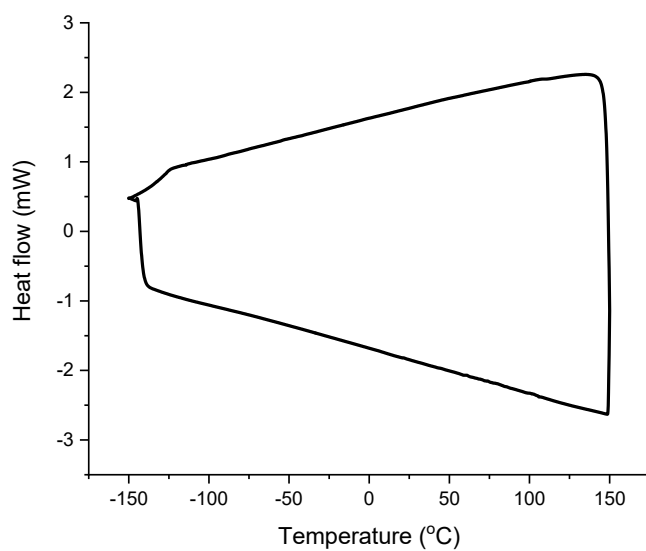

**Fig. S9** DSC plot for **2** in the temperature range -150 °C to 150 °C.

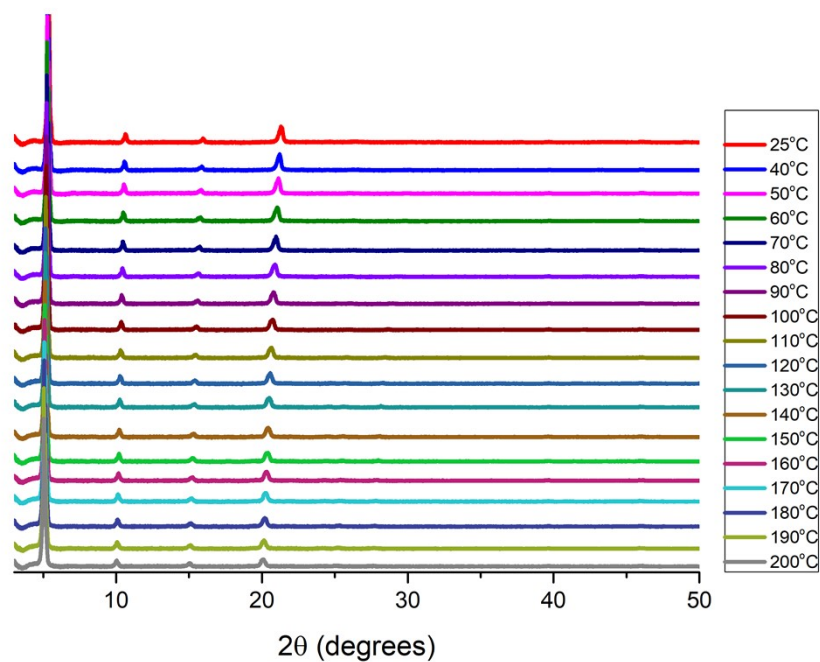

**Fig. S10** Variable temperature PXRD of **1** at temperature ranging from 25 °C to 200 °C.

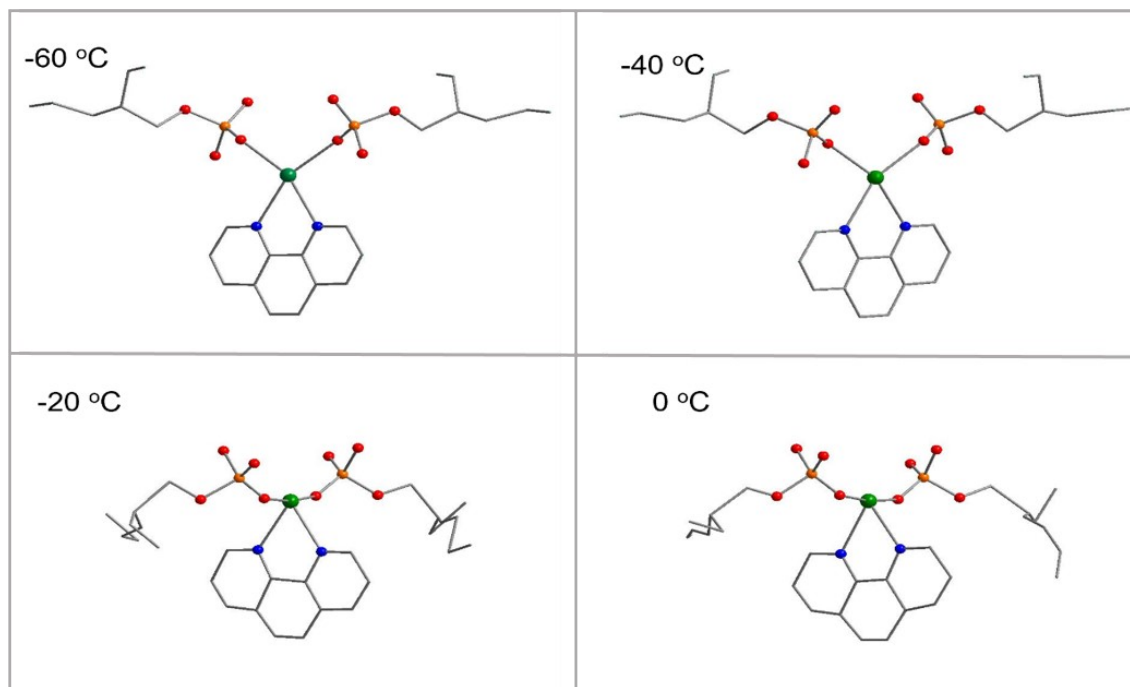

**Fig. S11** SC-XRD derived molecular structure of **1** along a-axis at different temperatures.

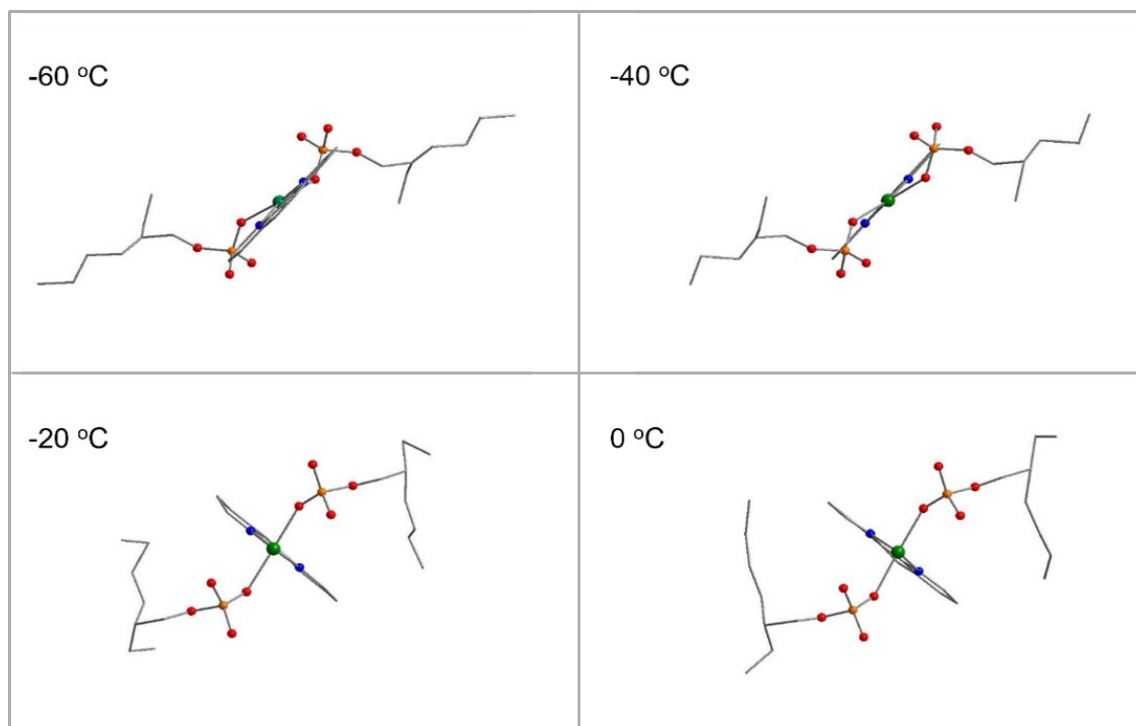

**Fig. S12** SC-XRD derived molecular structure of **1** along b-axis at different temperatures.

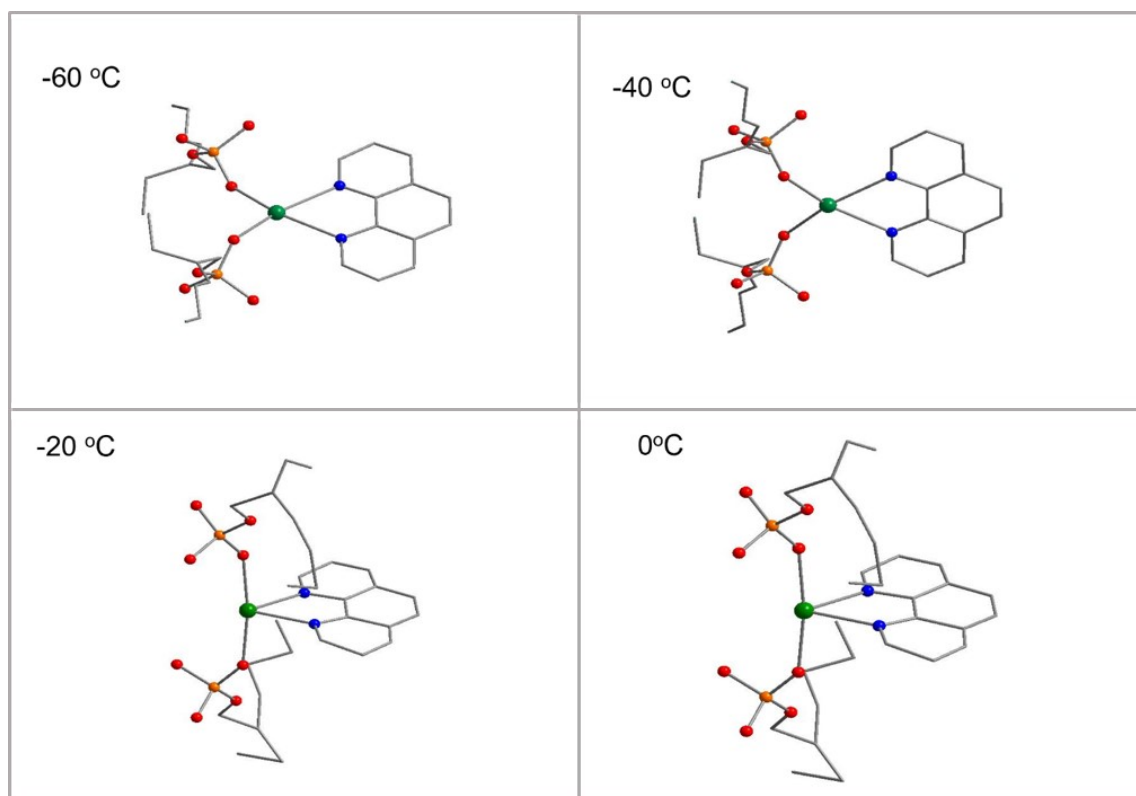

**Fig. S13** SC-XRD derived molecular structure of **1** along c-axis at different temperatures.



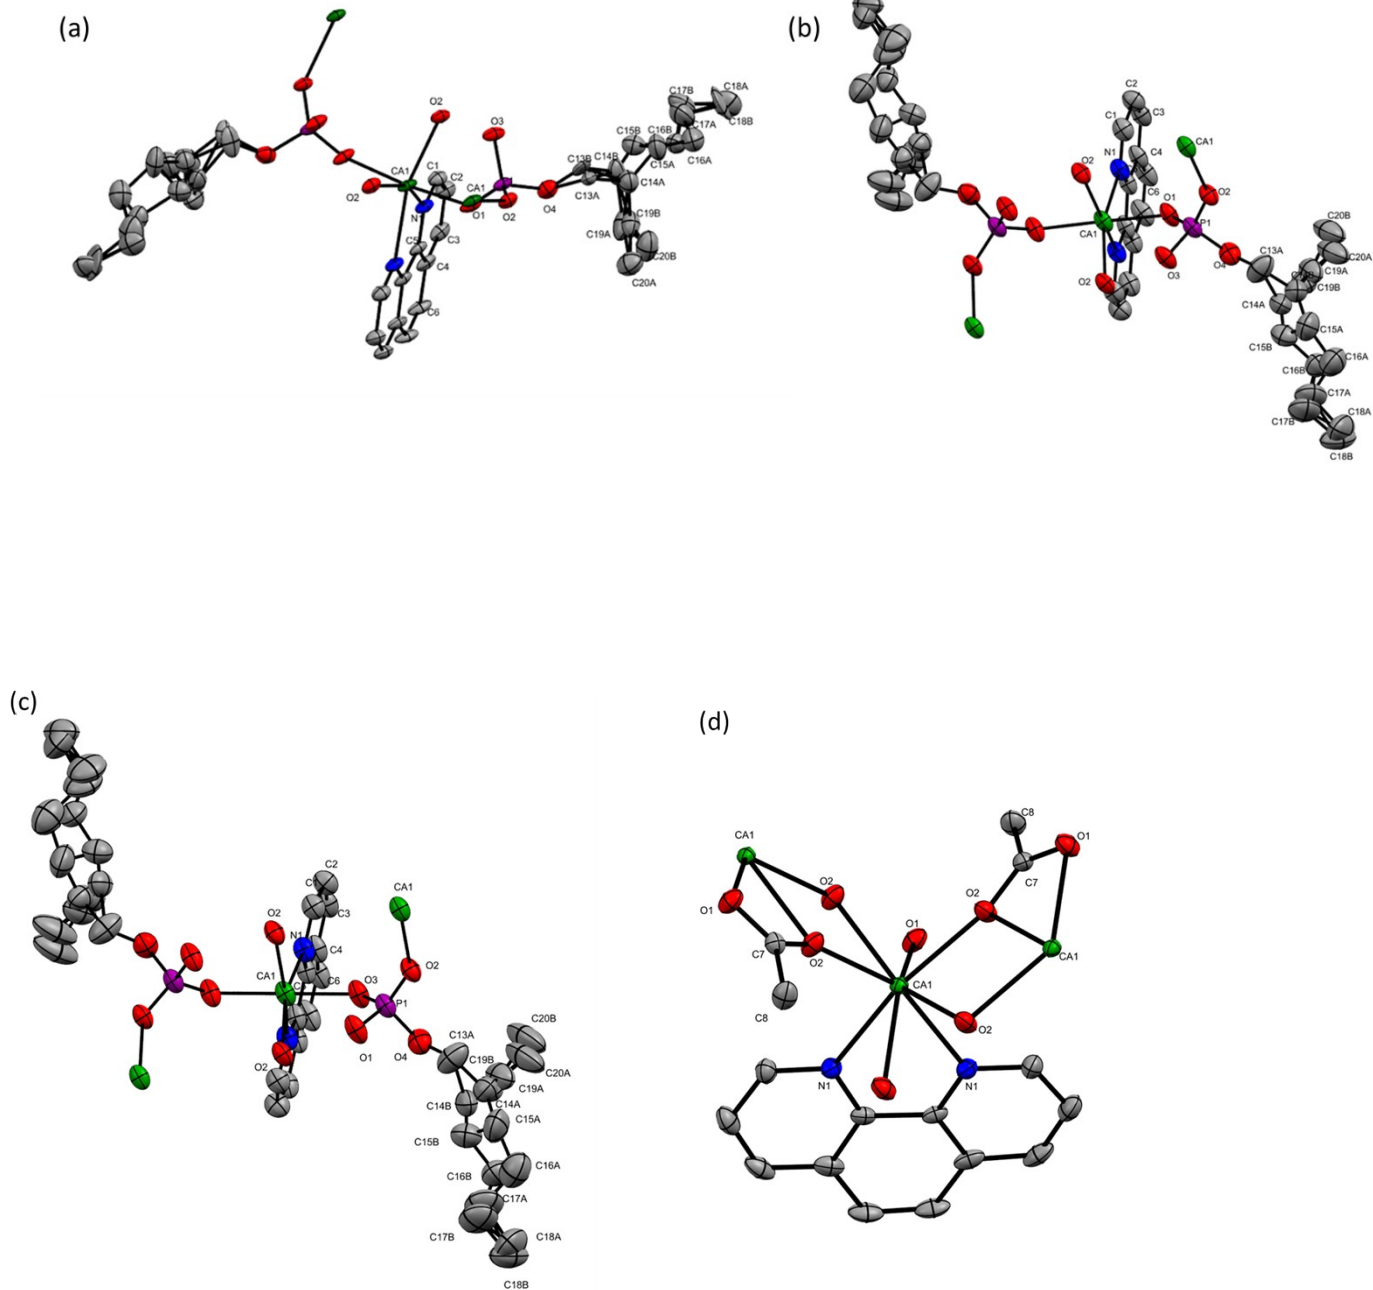

**Fig.S14** (a) ORTEP diagram for **1** at -123 °C (100 K), (b) ORTEP diagram for **1** at -70 °C (203 K), (c) ORTEP diagram for **1** at -40 °C (233 K) and (d) ORTEP diagram for **2** at 50 % probability.

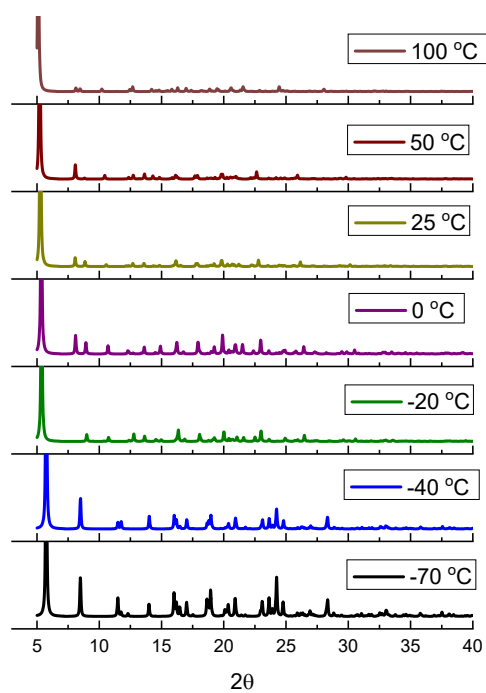

**Fig. S15** Calculated PXRD of **1** from the single crystal diffraction data at -70 °C, -40 °C, -20 °C, 0 °C, 25 °C, 50 °C and 100 °C.

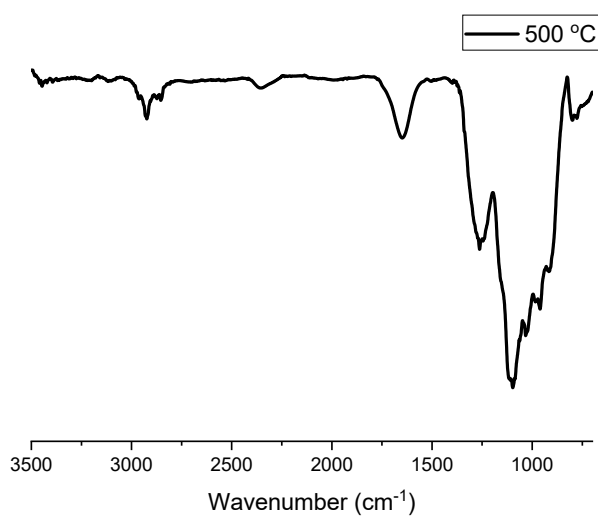

**Fig. S16** FT-IR of the decomposition product of **1** heated at 500 °C, corresponding to an amorphous calcium phosphate impregnated in carbon.

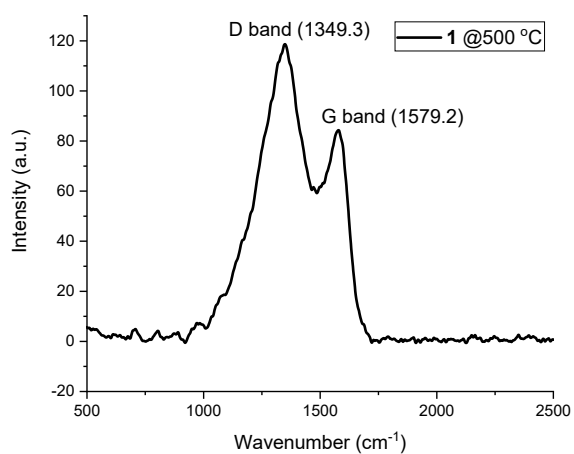

**Fig. S17** Raman spectrum of **1** thermolysed at 500 °C showing bands for residual carboneous phase. (Pimenta, M. A. et al. *Phys. Chem. Chem. Phys.*, 2007, **9**, 1276–1291.)

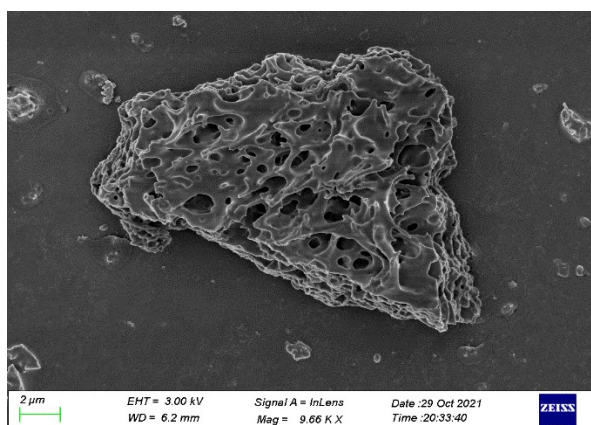

**Fig. S18** SEM image of material obtained after thermal decomposition of **1** at 500 °C corresponding to an amorphous calcium phosphate impregnated in carbon.

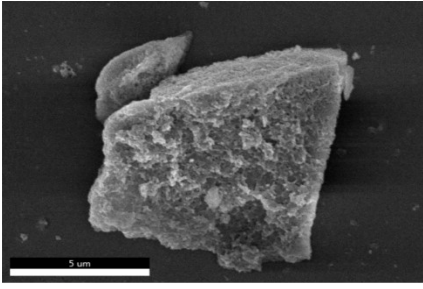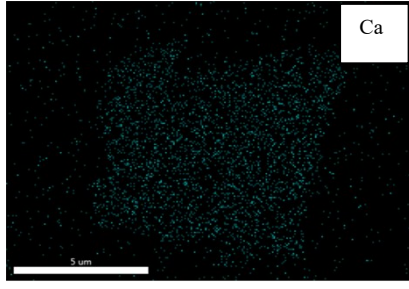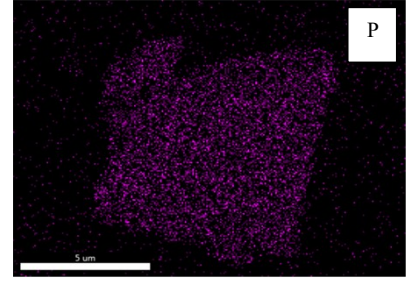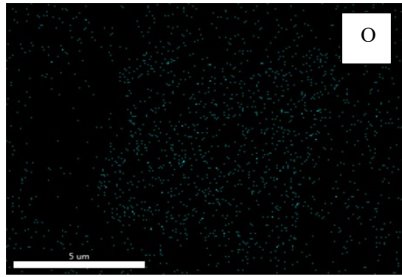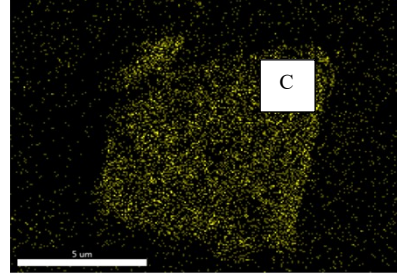

**Fig. S19** EDS mapping of material obtained after thermal decomposition of **1** at 500 °C corresponding to an amorphous calcium phosphate impregnated in carbon.

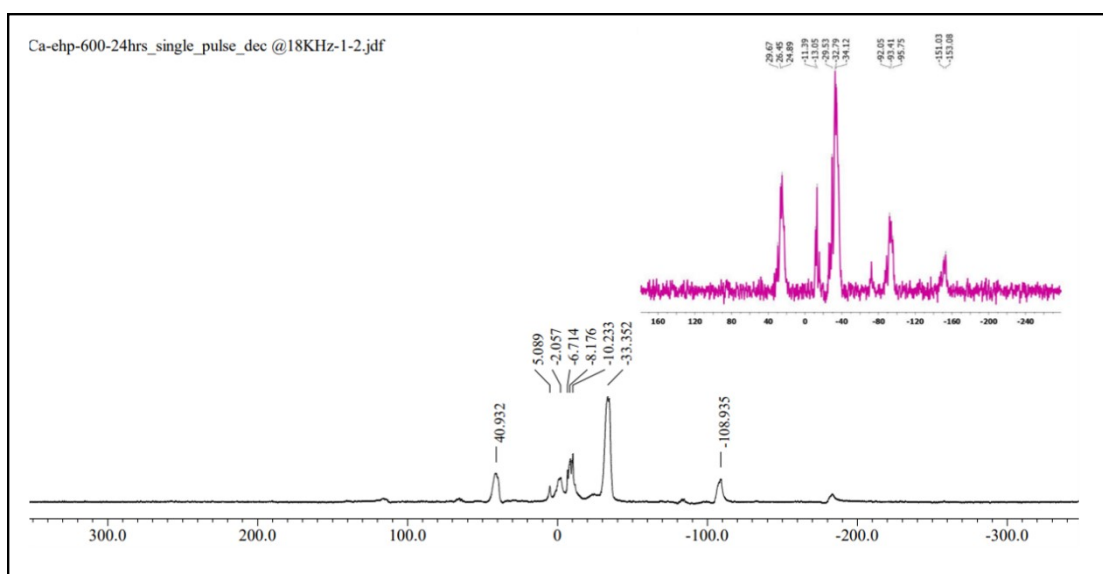

**Fig. S20**  $^{31}\text{P}$  NMR of decomposition product of **1** at 600 °C corresponding to  $\alpha\text{-Ca}(\text{PO}_3)_2$ . Inset: for comparison the  $^{31}\text{P}$  MAS NMR spectrum of decomposition product  $[\text{Ca}(\text{dtbp})_2]_n$  at 600 °C producing same material. (S. Verma and R. Murugavel, *Inorg. Chem.*, 2020, **59**, 13233–13244.)

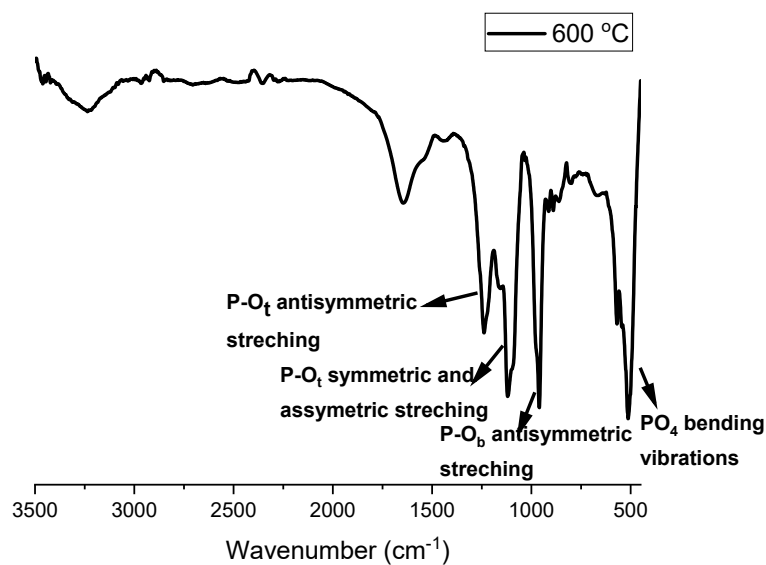

**Fig. S21** FT-IR spectrum of decomposition product of **1** calcined product  $\alpha\text{-Ca}(\text{PO}_3)_2$  produced at 600 °C. (Weil, M. et al. *Chem. Mater.* 2007, **19**, 5067-5073.)

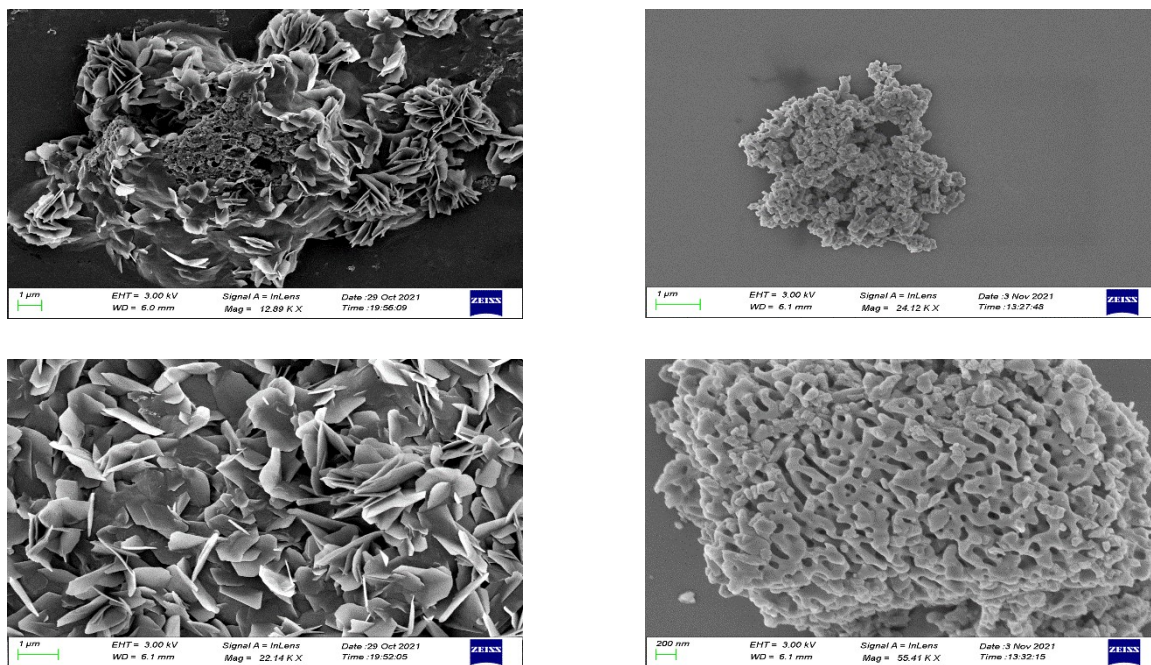

**Fig. S22** SEM images of  $\alpha\text{-Ca}(\text{PO}_3)_2$  material obtained after thermal decomposition of **1** at 600 °C.

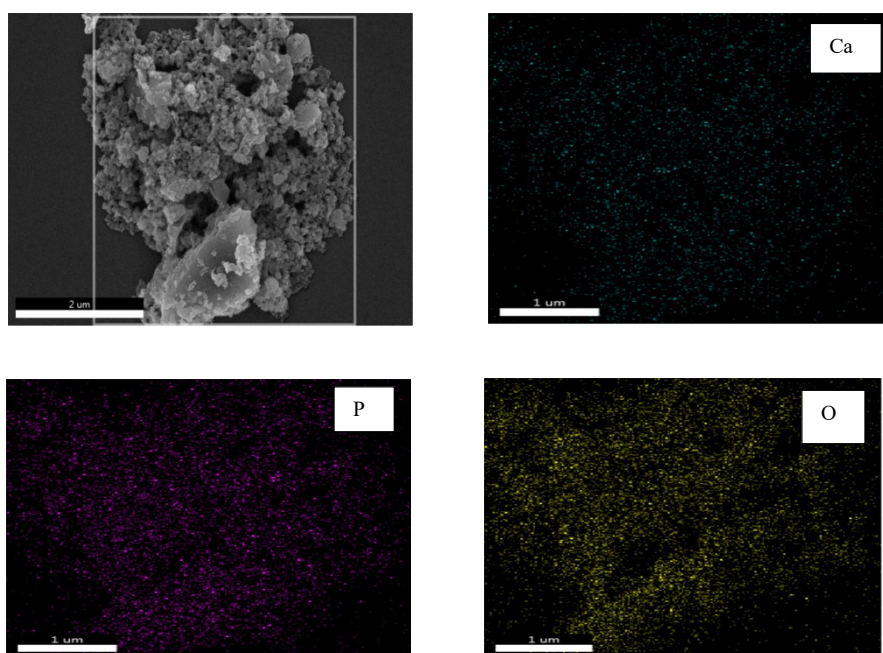

**Fig. S23** EDS mapping of  $\alpha\text{-Ca}(\text{PO}_3)_2$  material obtained after thermal decomposition of **1** at 600 °C.

**Table S1.** Continuous Shape measures of the coordination polyhedra of six coordinated Ca(II) in **1**.

| Label       | Symmetry  | Shape                         | Deviation    |
|-------------|-----------|-------------------------------|--------------|
| HP-6        | D6h       | Hexagon                       | 31.544       |
| PPY-6       | C5v       | Pentagonal pyramid            | 21.695       |
| <b>OC-6</b> | <b>Oh</b> | <b>Octahedron</b>             | <b>2.581</b> |
| TPR-6       | D3h       | Trigonal prism                | 9.049        |
| JPPY-6      | C5v       | Johnson pentagonal pyramid J2 | 25.742       |

**Table S2.** Selected bond lengths [Å] and angles [°] for **1**.

|                   |             |                     |           |
|-------------------|-------------|---------------------|-----------|
| Ca(1)-O(1)        | 2.17        | O(1)#1-Ca(1)-O(2)#3 | 90.81(7)  |
| Ca(1)-O(2)#2      | 2.17        | O(1)-Ca(1)-N(1)#1   | 87.86(7)  |
| Ca(1)-N(1)        | 2.17        | O(1)#1-Ca(1)-N(1)#1 | 99.61(8)  |
| P(1)-O(1)         | 1.57        | O(1)#1-Ca(1)-N(1)   | 87.86(7)  |
| P(1)-O(2)         | 1.57        | O(2)#3-Ca(1)-O(2)#2 | 103.8(1)  |
| P(1)-O(3)         | 1.57        | O(2)#2-Ca(1)-N(1)   | 158.40(7) |
| P(1)-O(4)         | 1.57        | O(1)-P(1)-O(2)      | 118.4(1)  |
| O(4)-C(13A)       | 1.37<br>(1) | O(1)-P(1)-O(4)      | 105.7(1)  |
| O(4)-C(13A)       | 1.37        | O(2)-P(1)-O(3)      | 107.4(1)  |
| N(1)-C(1)         | 1.37        | O(2)-P(1)-O(4)      | 108.1(1)  |
| N(1)-C(5)         | 1.37        | O(3)-P(1)-O(4)      | 105.1(1)  |
| O(1)-Ca(1)-O(1)#1 | 171.1       | O(1)-P(1)-O(3)      | 110.6 (1) |
| O(1)-Ca(1)-O(2)#2 | 83.1        | O(3)-P(1)-O(4)      | 105.1(1)  |

Symmetry transformations used to generate equivalent atoms:

#1 1/2-X,+Y,1-Z; #2 1-X,2-Y,1-Z; #3 -1/2+X,2-Y,+Z

**Table S3.** Continuous Shape measures of the coordination polyhedra of eight coordinated Ca(II) in **2**.

| Label         | Symmetry   | Shape                                | Deviation    |
|---------------|------------|--------------------------------------|--------------|
| OP-8          | D8h        | Octagon                              | 29.810       |
| HPY-8         | C7v        | Heptagonal pyramid                   | 22.798       |
| HBPY-8        | D6h        | Hexagonal bipyramid                  | 11.013       |
| CU-8          | Oh         | Cube                                 | 9.091        |
| SAPR-8        | D4d        | Square antiprism                     | 6.991        |
| TDD-8         | D2d        | Triangular dodecahedron              | 6.446        |
| JGBF-8        | D2d        | Johnson gyrobifastigium J26          | 9.434        |
| JETBPY-8      | D3h        | Johnson elongated triangular bpy J14 | 21.767       |
| JBTPR-8       | C2v        | Biaugmented trigonal prism J50       | 6.219        |
| <b>BTPR-8</b> | <b>C2v</b> | <b>Biaugmented trigonal prism</b>    | <b>5.819</b> |
| <b>JSD-8</b>  | <b>D2d</b> | <b>Snub diphenoid J84</b>            | <b>5.414</b> |
| TT-8          | Td         | Triakis tetrahedron                  | 9.931        |



|         |     |                              |        |
|---------|-----|------------------------------|--------|
| ETBPY-8 | D3h | Elongated trigonal bipyramid | 17.670 |
|---------|-----|------------------------------|--------|

**Table S4.** Bond lengths [Å] and angles [°] for **2**.

|              |          |
|--------------|----------|
| Ca(1)-O(2)   | 2.352(2) |
| Ca(1)-N(1)   | 2.526(2) |
| Ca(1)-O(1)#2 | 2.555(2) |
| O(1)-C(7)    | 1.244(3) |
| O(2)-C(7)    | 1.278(3) |
| N(1)-C(1)    | 1.324(2) |
| N(1)-C(5)    | 1.359(3) |

#<sup>1</sup> X, 1-Y, -1/2+Z; #<sup>2</sup> 1-X, 1-Y, 2-Z; #<sup>3</sup> 1-X, +Y, 3/2-Z

|                     |           |
|---------------------|-----------|
| O(1)#1-Ca(1)-O(1)#2 | 146.42(8) |
| O(2)#3-Ca(1)-O(1)#2 | 119.39(6) |
| O(2)#1-Ca(1)-O(2)#2 | 149.68(8) |
| O(2)-Ca(1)-N(1)     | 158.45(7) |
| N(1)-Ca(1)-O(1)#2   | 79.63(7)  |
| N(1)-Ca(1)-O(2)#1   | 120.59(6) |
| N(1)#3-Ca(1)-N(1)   | 65.6(1)   |
| O(1)-C(7)-O(2)      | 121.4(2)  |
| O(1)-C(7)-C(8)      | 119.9(2)  |
| O(2)-C(7)-C(8)      | 118.7(2)  |

Symmetry transformations used to generate equivalent atoms:

#<sup>1</sup> 1-X, 1-Y, 2-Z; #<sup>2</sup> +X, 1-Y, -1/2+Z; #<sup>3</sup> 1-X, +Y, 3/2-Z

**Table S5.** Heat flow vs temperature data for compound **1** in the temperature range from -150 °C to 200 °C.

|        | T <sub>mid</sub> (heating)<br>(°C) | T <sub>mid</sub> (cooling)<br>(°C) | Enthalpy of<br>transition<br>(heating) (J/g) | Enthalpy of<br>transition(cooling)<br>(J/g) |
|--------|------------------------------------|------------------------------------|----------------------------------------------|---------------------------------------------|
| Peak 1 | -14.3                              | -44.2                              | 20.1                                         | 18.5                                        |
| Peak 2 | 73.0                               | 79.0                               | 0.3                                          | 0.3                                         |

\* T<sub>mid</sub> represents the mid-point of the corresponding transition in the DSC curve.
